# Supplementary material for: Self-Delivering RNAi Targeting PD-1 Improves Tumor-Specific T Cell Functionality for Adoptive Cell Therapy of Malignant Melanoma
Source: PubMed Central journal article supplement — Mol Ther. 2018 Apr 13;26(6):1482–93. doi: 10.1016/j.ymthe.2018.04.015 (PMC5986970; doi:10.1016/j.ymthe.2018.04.015), 2018-04-13
Supplement: mmc1.pdf [file mmc1.pdf]

YMTHE, Volume 26

## **Supplemental Information**

### **Self-Delivering RNAi Targeting PD-1 Improves Tumor-Specific T Cell Functionality for Adoptive Cell Therapy of Malignant Melanoma**

**Maarten A. Ligtenberg, Yago Pico de Coaña, Taisia Shmushkovich, Yuya Yoshimoto, Iva Truxova, Yuan Yang, Monica Betancur-Boissel, Alexey V. Eliseev, Alexey D. Wolfson, and Rolf Kiessling**

**Table S1. List of PDCD1 (NM\_005018) targeting sequences selected for screening.**

| ## | ID   | Target sequence       |
|----|------|-----------------------|
| 1  | PD60 | TATTATATTATAATTATAAT  |
| 2  | PD61 | TCTATTATATTATAATTATA  |
| 3  | PD62 | CATTCCTGAAATTATTTAAA  |
| 4  | PD63 | CTATTATATTATAATTATAA  |
| 5  | PD64 | AGTTTCAGGGAAGGTCAGAA  |
| 6  | PD65 | TGTGGTTCTATTATATTATA  |
| 7  | PD66 | TGTGGTTCTCTGTGGACTATG |
| 8  | PD67 | CCCATTCTGAAATTATTTA   |
| 9  | PD68 | TGCCACCATTGTCTTTCCTA  |
| 10 | PD69 | AAGTTTCAGGGAAGGTCAGA  |
| 11 | PD70 | CTGTGGTTCTATTATATTAT  |
| 12 | PD71 | TTCTATTATATTATAATTAT  |
| 13 | PD72 | TTTCAGGGAAGGTCAGAAGA  |
| 14 | PD73 | CTTGAACCCATTCTGAAA    |
| 15 | PD74 | TCCCTGTGGTTCTATTATAT  |
| 16 | PD75 | CCTGTGGTTCTATTATATTA  |
| 17 | PD76 | TGGAACCCATTCTGAAATT   |
| 18 | PD77 | CCTTCCCTGTGGTTCTATTA  |
| 19 | PD78 | TTCCCTGTGGTTCTATTATA  |
| 20 | PD79 | CACAGGACTCATGTCTCAAT  |

**Table S2. Antibodies used in flow cytometry**

| Marker                       | Conjugate   | Clone        |
|------------------------------|-------------|--------------|
| CCR5 <sup>2</sup>            | FITC        | HEK/1/85a    |
| CCR7 <sup>1</sup>            | PE          | 150503       |
| CD107a <sup>2</sup>          | FITC        | H4A3         |
| CD3 <sup>2</sup>             | PE-Cy7      | UCHT1        |
| CD3 <sup>6</sup>             | -           | SP7          |
| CD4 <sup>3</sup>             | PE-CF594    | S3.5         |
| CD8 <sup>2</sup>             | APC-Cy7     | SK1          |
| CD28 <sup>2</sup>            | PerCP-Cy5.5 | CD28.2       |
| CD45RA <sup>2</sup>          | APC         | HI100        |
| CD69 <sup>2</sup>            | APC-Cy7     | FN50         |
| CD95 <sup>4</sup>            | APC         | NOK-1        |
| CXCR3 <sup>2</sup>           | PB          | G025H7       |
| IFN- $\gamma$ <sup>2</sup>   | PE-Cy7      | 4s.B3        |
| MICA/B <sup>2</sup>          | APC         | 6D4          |
| TNF- $\alpha$ <sup>2</sup>   | APC         | MAb11        |
| PD1 <sup>2</sup>             | PB          | EH12.2H7     |
| PDL1 <sup>1</sup>            | PE-Cy7      | MIH1         |
| PDL2 <sup>1</sup>            | PE-CF594    | MIH18        |
| TRAIL-R2 <sup>2</sup>        | PE          | DJR2-4 (7-8) |
| ULBP2/5/6                    | PerCP       | 165903       |
| Goat Anti-<br>Rabbit IgG H&L | Alf488      | -            |

<sup>1</sup>BD Biosciences (San Jose, CA), <sup>2</sup>BioLegend (San Diego, CA), <sup>3</sup>Invitrogen (Carlsbad, CA), <sup>4</sup>Miltenyi Biotech, <sup>5</sup>eBioscience (San Diego, CA).

Figure S1

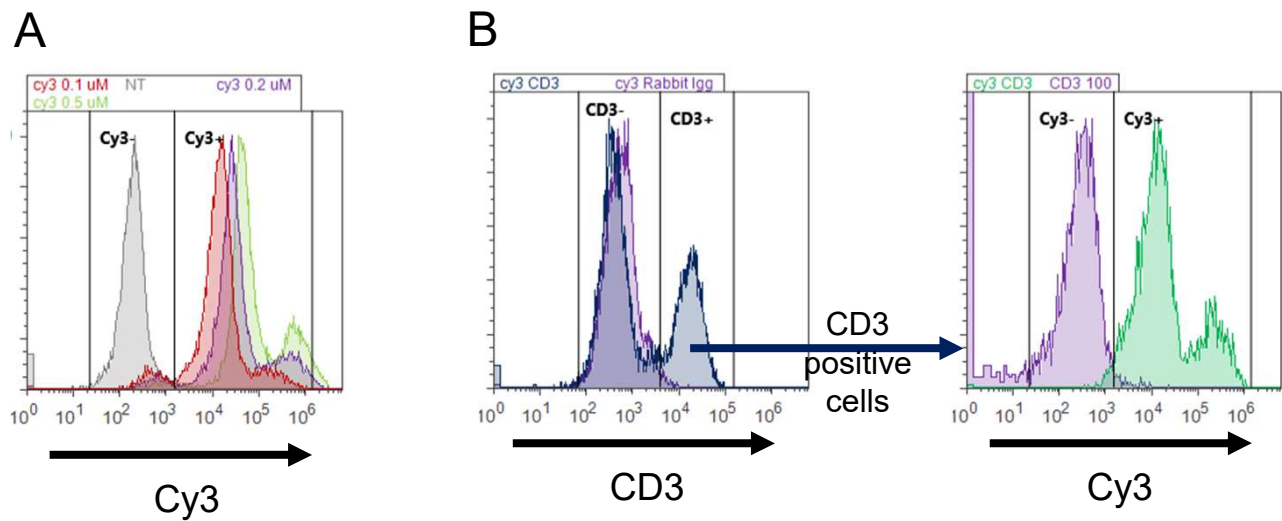

**Figure S1.**

**Uptake of sdRNA by CD3 positive PBMC cells (T cells).**

Peripheral blood mononuclear cells cultured in presence of PHA (1.5% final; Gibco, 10576015) and IL2 (1000 U/ml; PHC0026) were incubated with 0.1  $\mu$ M, 0.2  $\mu$ M or 0.5  $\mu$ M MAP4K4-cy3 sdRNA for 72 h. Cells treated with 0.1  $\mu$ M sdRNA were stained with rabbit anti-CD3 antibody (see antibody table) at 1:100 dilution or with rabbit IgG, as a reference, followed by 1:2000 diluted secondary Alexa Fluor-488 antibody. Fluorescence quantitative data was acquired with Attune Flow Cytometer (Applied Biosystems) and analyzed using FlowJo software (Treestar Inc).

Overall transfection efficiency of cy3-conjugated sdRNA was gated at 92.8%, 95.1% and 97% cells incubated with 0.1  $\mu$ M, 0.2  $\mu$ M or 0.5  $\mu$ M sdRNA, respectively (A). Out of 35% of singlet cells gated positive for CD3, 97.4% show positive sdRNA uptake (B).

## Figure S2

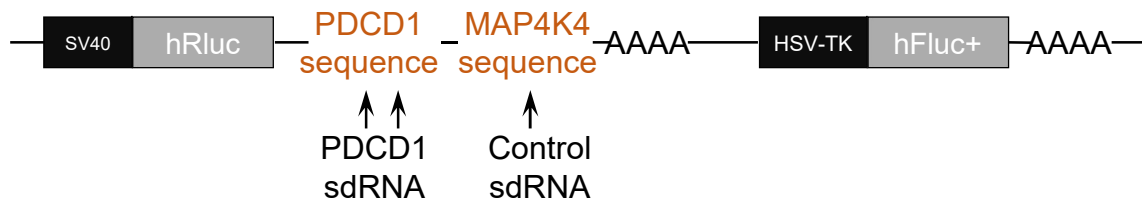

### Figure S2.

#### Schematic representation of a dual-luciferase reporter plasmid constructed for sdRNA screening.

PD1 sdRNA target sequence was inserted downstream of Renilla under the same promoter into psiCheck2 vector (Promega, C8021). Positive control targeting sequence for MAP4K4 sdRNA was cloned into the same cassette to monitor for cross-assay variability. Renilla luciferase activity was normalized to firefly luciferase activity expressed under a separate promoter.

Figure S3

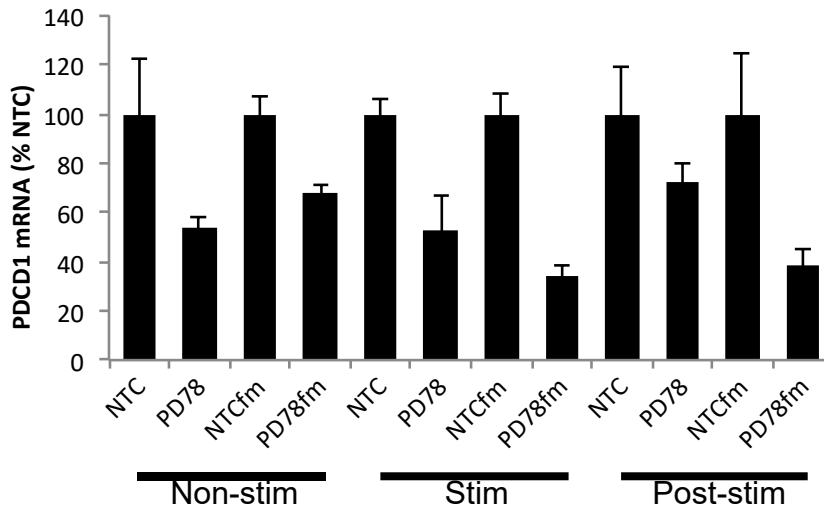

**Figure S3.**

**Increased efficacy of fully modified PD78fm sdRNA in activated T cells.**

Primary T cells were activated with anti-CD3/CD28 magnetic beads for 5 days or left unstimulated ("Non-stim") in a growth medium - AIM-V supplemented with 10% FBS and 500 U/ml IL2 (ProSpec). Activated cells were transfected with sdRNA either in presence of the beads ("Stim"), or after beads removal on a Dynamagnet ("Post-stim"). For transfection, all three groups of cells were incubated with 2  $\mu$ M PD78 or PD78fm sdRNA for 72 h. Gene expression was detected using Taqman probes in one-step qPCR, normalized for GAPDH expression and adjusted for the standard curve. Data plotted as percent of non-treated cells (n = 3; mean  $\pm$  SD).

Figure S4

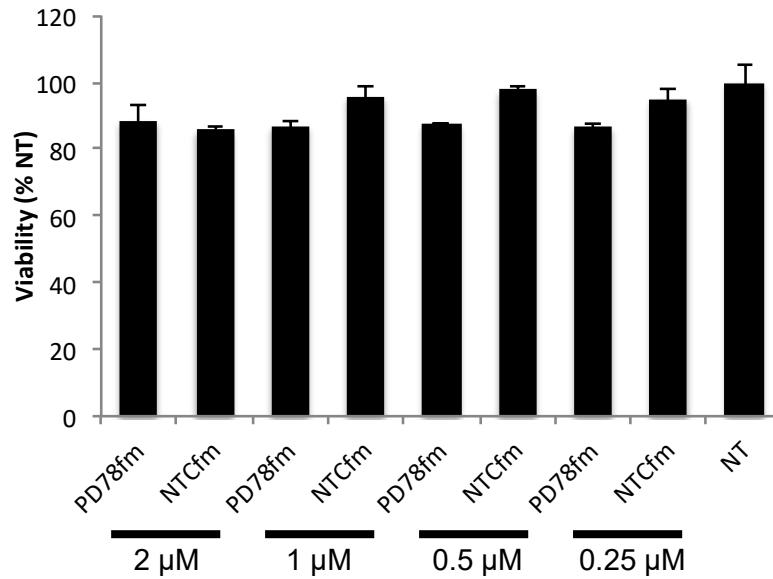

**Figure S4.**

**Viability of T cells treated with PD78fm sdRNA.**

T cells were activated with anti-CD3/CD28 magnetic beads and incubated with indicated doses of PD78fm sdRNA for 72 h in the presence of beads. Viability was determined using CellTiter-Blue reagent. Fluorescence of converted dye was measured in SpectraMax plate reader (Molecular Devices) and expressed as percent of non-treated (NT) cells (n = 3; mean ± SD). NTC (non-targeting control) serves as non-specific reference of sdRNA effect on cells.

Figure S5

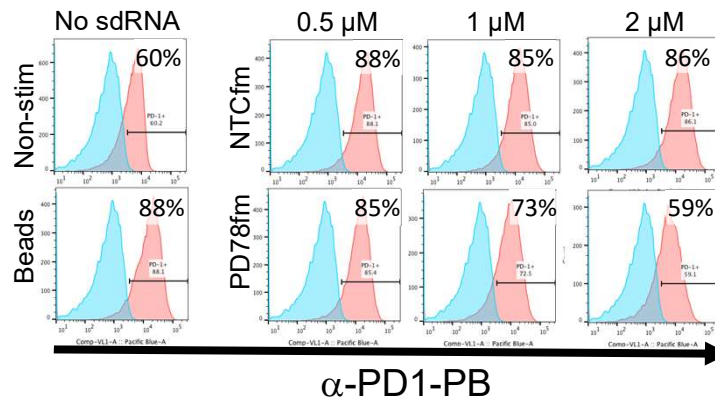

Figure S5

**Intracellular PD-1 levels after treatment with increasing concentrations of PD78fm or the control sdRNA NTCfm.**

T cells were cultured for four days in the presence of PD78fm at varying concentrations or non-targeting control (NTCfm) followed by stimulation with CD3/CD28 beads



Figure S6

A

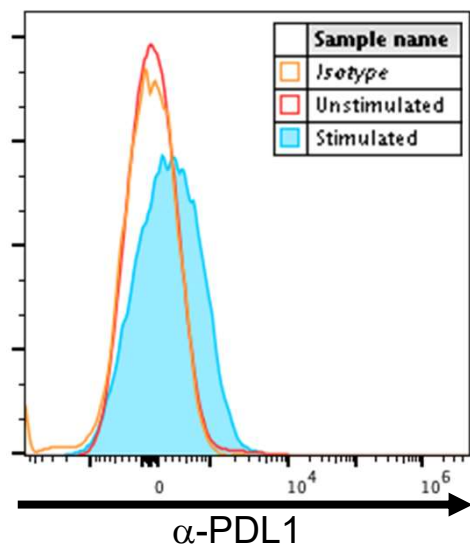

B

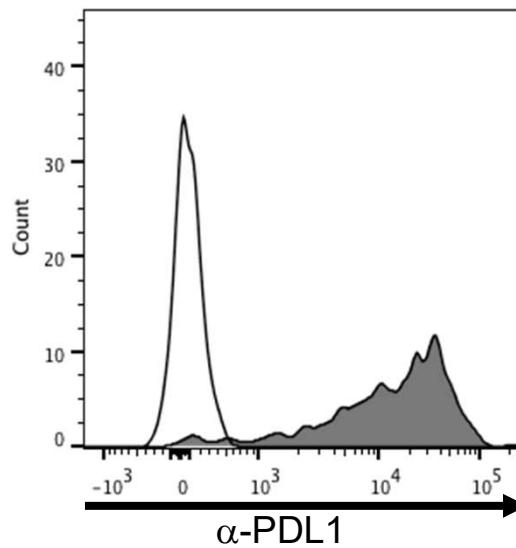

Figure S6

**Surface PD-L1 levels**

- A. T cells were stimulated overnight with CD3/CD28 beads and stained for PD-L1
- B. Short term passage melanoma cell line KADA PD-L1 surface expression

Figure S7

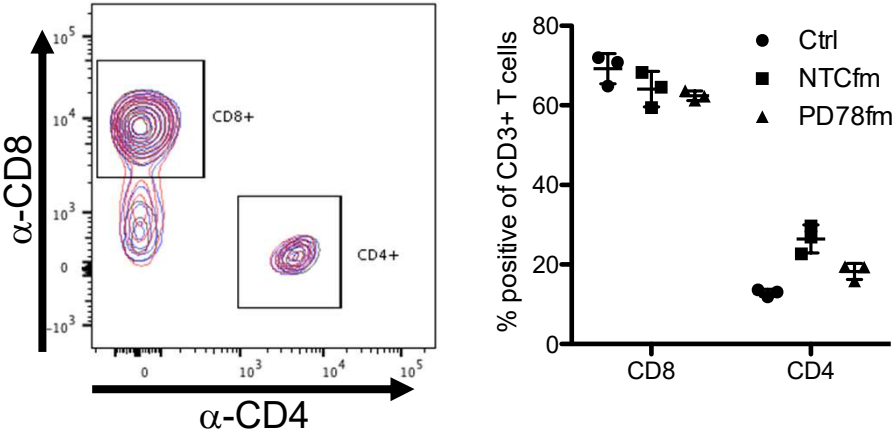

**Figure S7**  
**CD4<sup>+</sup> and CD8<sup>+</sup> cell frequencies in TIL after REP**

T cells were expanded for two weeks in CellGro medium supplemented with 2% human AB serum, 30 ng/ml OKT-3 and 300 U/ml IL-2. sdRNA was added at a 2  $\mu$ M concentration on days 4, 8 and 12
